# Supplementary material for: Endurance Exercise-Induced Fgf21 Promotes Skeletal Muscle Fiber Conversion through TGF-β1 and p38 MAPK Signaling Pathway
Source: MDPI journal article supplement (doi:10.3390/ijms241411401), 2023-07-13
Supplement: s1 [file s1]

## *Supplementary Material*

### **Exercise-induced Fgf21 promotes skeletal muscle fiber conversion through TGF- $\beta$ 1 and p38 MAPK signaling pathway**

Xiaomao Luo<sup>1</sup>, Huiling Zhang<sup>1</sup>, Xiaorui Cao<sup>1</sup>, Ding Yang<sup>2</sup>, Yi Yan<sup>1</sup>, Jiayin Lu<sup>1</sup>, Xiaonan Wang<sup>3</sup>, Haidong Wang<sup>1\*</sup>

\* Correspondence:

wanghaidong@sxau.edu.cn

#### **1 Supplementary Figures and Tables**

##### **1.1 Supplementary Figures**

**Fig S1**

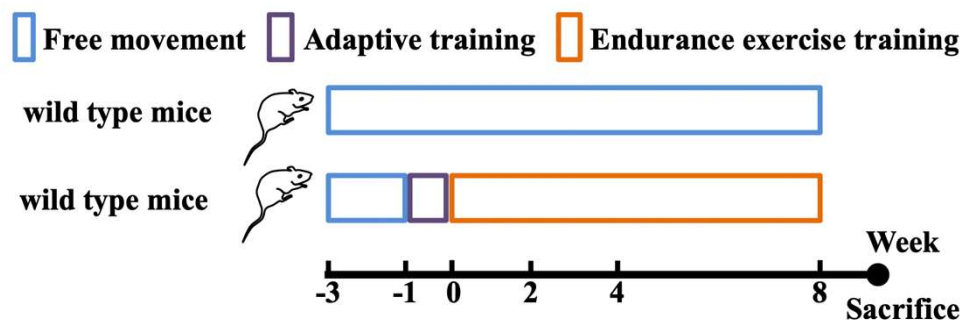

**Fig S1. The wild-type mouse endurance exercise training mode diagram.** Wild-type mice are divided into 2 groups. After free movement and adaptive training for 4 weeks, mice undergo endurance exercise training lasting 8 weeks.

**Fig S2**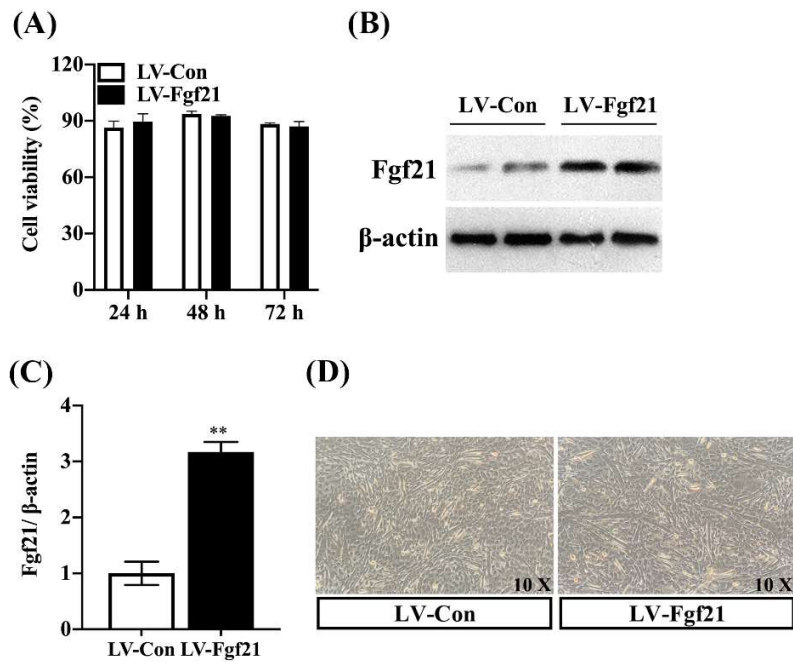

**Fig S2. Overexpression of Fgf21 and Fgf21 promotes myogenesis in C2C12 cells.** (A) C2C12 cells were respectively infected with 100 MOIs of lentivirus for 24 h, 48 h, and 72 h. The cell viability was detected by CCK-8. (B) C2C12 cells were infected with lentivirus and then analyzed the levels of Fgf21 were by western blotting. (C) The analysis was reported in the bar graph as the fold change of each protein, normalized to the β-actin. (D) C2C12 cells were treated with LV-Con and LV-Fgf21 lasting 12 h, changed the medium with 2% horse serum for 5 days, and light microscopy observed the differentiation of myotubes. Bars mean  $P \leq 0.05$  analyses followed by non-paired Student's t-test. \*\* $P < 0.01$  vs. LV-Con.

## Fig S3

(A)

**Fgf21 Wildtype allele**

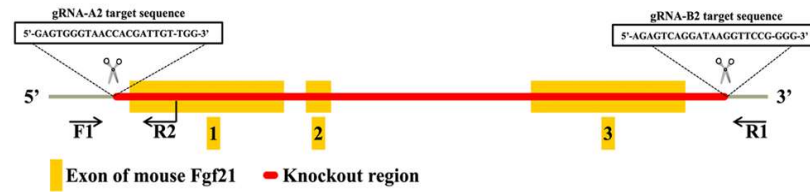

(B)

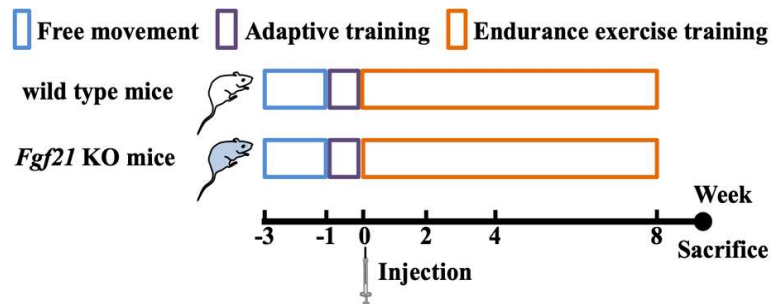

**Fig S3. The mode diagrams of *Fgf21* knockout mice genotyping strategy and wild-type or *Fgf21* KO mice experimental design.** (A) The *Fgf21* gene (NCBI Sequence: NM\_020013) was used to produce KO mice by co-injecting Cas9 and gRNA into fertilized eggs. (B) Experiment procedure: Mice were divided into 4 groups: wild-type mice, wild-type mice with rhFgf21 treatment, *Fgf21* KO mice, and *Fgf21* KO mice with an injection of rhFgf21, once per week.

**TABLE S1 | Sequences of the primers used in this study.**

| <b>Gene Primer</b>        | <b>Primer sequence (5'-3')</b>      |
|---------------------------|-------------------------------------|
| Genotype- <i>Fgf21</i> _F | CAGACCCAGGAGTGTAGACTTCAG            |
| Genotype- <i>Fgf21</i> _R | CCAGTGGTTCCATTCTCAGTAC              |
| LV- <i>Fgf21</i> _F       | CCGGAAGAGATGGAATGGATGAGATCTAGAGTTGG |
| LV- <i>Fgf21</i> _R       | CCGGAATTCTCAGGACGCATAGGATGCC        |

**TABLE S2 | Primers for Q-PCR in this study.**

| <b>Gene Primer</b>    | <b>Primer sequence (5'-3')</b> |
|-----------------------|--------------------------------|
| Fgf21_qPCR_F          | ACCTGGAGATCAGGGAGGAT           |
| Fgf21_qPCR_R          | GTCCTCCAGCAGCAGTTCTC           |
| MyHC I_qPCR_F         | AGAGCCAAGAGGAAACTGGAGG         |
| MyHC I_qPCR_R         | CTCGTCCTCAATCTTGCTCTGC         |
| MyHC IIa_qPCR_F       | ATGAGCTCCGACGCCGAG             |
| MyHC IIa_qPCR_R       | TCTGTTAGCATGAACTGGTAGGCG       |
| MyHC IIb_qPCR_F       | TGATCACCACCAACCCAT             |
| MyHC IIb_qPCR_R       | CAGCCTTGTCAGCAACTTC            |
| MyHC IIx_qPCR_F       | AAGGAGCAGGACACCAGCGCCCA        |
| MyHC IIx_qPCR_R       | ATCTCTTTGGTCACTTTCCTGCT        |
| Tnnt1_qPCR_F          | ACTGCCTCCCGTAAACTCATG          |
| Tnnt1_qPCR_R          | TCCTCATCCACCACCTCTACC          |
| Tnnt3_qPCR_F          | CCCTCATTGACAGCCACTT            |
| Tnnt3_qPCR_R          | CAATCTGTTCTGGCGTTCC            |
| MyoD_qPCR_F           | GAATGGCTACGACACCGCCTACTAC      |
| MyoD_qPCR_R           | ACGGGGTCTGGGTTCCCTGTT          |
| MyoG_qPCR_F           | AACTACCTTCCTGTCCACCTTC         |
| MyoG_qPCR_R           | CACAGACTTCCTCTTACACACCT        |
| $\beta$ -actin_qPCR_F | GCGCGGCTACAGCTTCACCA           |

---

$\beta$ -actin\_qPCR\_R

GGGCAGCGGAACCGCTCATT

---
